# Supplementary material for: Low Risk Perception about Ticks and Tick-Borne Diseases in an Area Recently Invaded by Ticks in Northwestern Italy
Source: MDPI journal article supplement (doi:10.3390/vetsci8070131), 2021-07-13
Supplement: s1 [file s1]

Do you know ticks?

Age: \_\_\_\_\_ Sex: ☐ M ☐ F

Employment: \_\_\_\_\_

Hometown / city: \_\_\_\_\_

1) Have you ever been bitten by tick? ☐ Yes ☐ No

If 'Yes',

- Where and when did the tick bite occur?  
\_\_\_\_\_
- What did you do?  
\_\_\_\_\_

2) On your opinion, do ticks endanger the health of humans and animals?  
☐ Yes ☐ No

If 'Yes', what kind of danger do they pose?  
\_\_\_\_\_  
\_\_\_\_\_

3) Have you heard about potential risks posed by ticks? ☐ Yes ☐ No

If 'Yes', from whom? What kind of risks did they mention?  
\_\_\_\_\_  
\_\_\_\_\_

4) Do you adopt any protective measure to protect yourself from tick bites?  
☐ Yes ☐ No

If 'Yes', could you please specify how do you protect from ticks?  
\_\_\_\_\_

5) Do you protect your pets/animals from ticks?  
☐ Yes ☐ No ☐ I don't own pets

If 'Yes', could you please specify how?  
\_\_\_\_\_

**Figure S1.** Questionnaire (translated from Italian) administered to the public during informative meetings on ticks and tick-borne diseases; Turin province, 2017-2019.
